# Supplementary material for: Acid induced conversion towards a robust and lithiophilic interface for Li–Li7La3Zr2O12 solid-state batteries
Source: Royal Society of Chemistry journal article supplement (doi:10.1039/c9ta01911a), 2019-01-01
Supplement: c9ta01911a1.pdf [file c9ta01911a1.pdf]

## Supporting Information

### Acid induced conversion towards robust and lithiophilic interface for Li- Li<sub>7</sub>La<sub>3</sub>Zr<sub>2</sub>O<sub>12</sub> solid-state battery

Yadong Ruan,<sup>a,b†</sup> Yang Lu,<sup>a,b†</sup> Xiao Huang,<sup>a,b</sup> Jianmeng Su,<sup>a,b</sup> Changzhi Sun,<sup>a,b</sup> Jun Jin,<sup>a,b</sup>  
Zhaoyin Wen<sup>a,b\*</sup>

*a CAS Key Laboratory of Materials for Energy Conversion, Shanghai Institute of  
Ceramics, Chinese Academy of Science, Shanghai 200050, P. R. China*

*b University of Chinese Academy of Science, Beijing 100049, P.R. China*

*\*Corresponding Author. E-mail: [zywen@mail.sic.ac.cn](mailto:zywen@mail.sic.ac.cn)*

† These authors contributed equally to this work.

## **Experimental section**

### **Preparation of LLZTO pellets**

Cubic phase  $\text{Li}_{6.5}\text{La}_3\text{Zr}_{1.5}\text{Ta}_{0.5}\text{O}_{12}$  was synthesized by conventional solid-state reaction method as literature.<sup>1</sup> The raw materials  $\text{LiOH}\cdot\text{H}_2\text{O}$  (AR),  $\text{La}_2\text{O}_3$  (99.99%),  $\text{ZrO}_2$  (AR),  $\text{Ta}_2\text{O}_5$  (99.99%) with stoichiometry ratio were mixed by wet ball-milling at 400 rpm for 6 h. Noticeably, 2wt% excess of  $\text{LiOH}\cdot\text{H}_2\text{O}$  was added to compensate for the lithium volatilization during the pellet sintering process at high temperature. Before ingredient mixing,  $\text{La}_2\text{O}_3$  was thoroughly dried by heat treatment at  $900^\circ\text{C}$  for 12 h. After dried at  $70^\circ\text{C}$  for 10 h, the mixture was calcined at  $950^\circ\text{C}$  for 6 h in an alumina crucible. The obtained white powder was the raw LLZTO powder.

Pyrochlore phase  $\text{La}_2\text{Zr}_2\text{O}_7$  (LZO) was also synthesized by solid-state reaction method from raw materials of  $\text{La}_2\text{O}_3$  (99.99%),  $\text{ZrO}_2$  (AR) with stoichiometry ratio.<sup>2</sup> The mixed powders were ball milled and calcined at  $1500^\circ\text{C}$  for 6 h in an alumina crucible.

4wt% additive LZO powder was mixed with the LLZTO powder via a wet grinding process at 250 rpm for 12 h. After that the slurry was dried at  $70^\circ\text{C}$  overnight and sieved over 200 mesh, the powder was uniaxially pressed into pellets using a stainless steel mould ( $\Phi 18\text{ mm} \times 2\text{ mm}$ ) and sintered at  $1250^\circ\text{C}$  for 0.5 h in a Pt crucible which bottom is covered by parent powder LLZTO. Finally, dense ceramic pellets were obtained and was about  $\sim 1.2\text{ mm}$  thick and  $\sim 14.0\text{ mm}$  in diameter.

### **Material characterization**

The phase analysis was characterized by powder XRD (Rigaku) using a  $\text{Cu K}\alpha$  radiation source operated at 40 kV and 30 mA from 10 to 80 degrees (2theta) with a scan speed of 6 degrees/min

to figure out the phase components during the material preparation. The morphology of the ceramic pellets and Li/LLZTO interface were examined by scanning electron microscope (SEM, Hitachi S-3400) and energy dispersive spectrometer (EDS, INCA Energy, Oxford Instruments, UK). Attenuated total reflectance Fourier transform infrared spectroscopy (ATR-FTIR, NICOLET NEXUS, America) as an important technique to detect the local vibrations of crystal symmetry was applied from a wavenumber of  $4000\text{ cm}^{-1}$  to  $500\text{ cm}^{-1}$ . X-ray photoelectron spectroscopy (XPS, Thermo scientific ESCALAB 250) was conducted to analyze the chemical composition of anodic interface before and after melting Li and all the spectra were fitted with Gaussian-Lorentzian functions and a Shirley-type background.

#### **Electrochemical characterization**

Electrochemical impedance spectroscopy (EIS) measurements were performed on Electrochemical workstation (Autolab PGSTAT302N Netherland) in a frequency range of 1 MHz to 0.1 Hz by applying an AC voltage with an amplitude of 10 mV. All the battery tests were carried out with a battery test system (LAND CT2001A, Wuhan in China). The galvanostatic discharge and charge tests of the batteries were measured using a cutoff voltage window of 2.5 V to 4.0 V, 2.8 V to 4.5 V, 1.5 V to 3.0 V corresponding to LFP, NCM, S/C as the cathode, respectively. All the electrochemical characterizations were operated at  $25^{\circ}\text{C}$ .

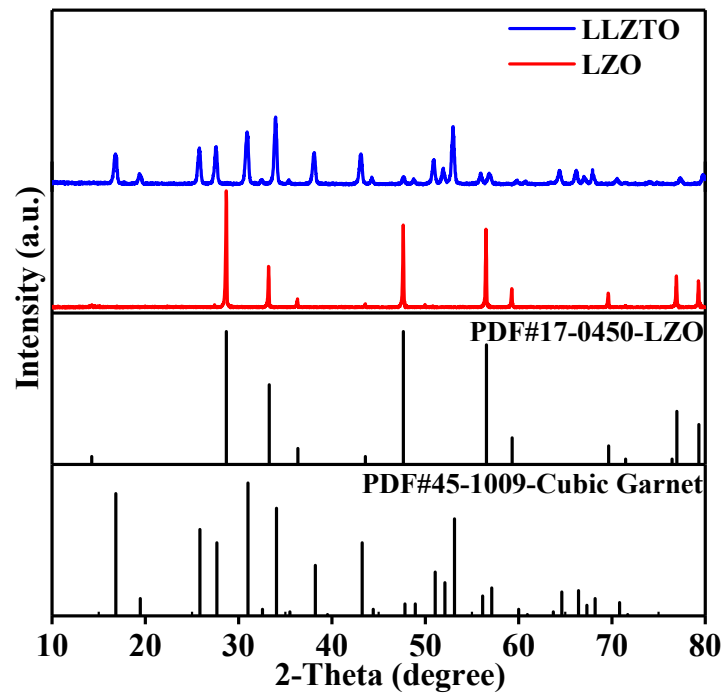

**Figure S1.** XRD patterns of as-synthesized LLZTO and LZO powder.

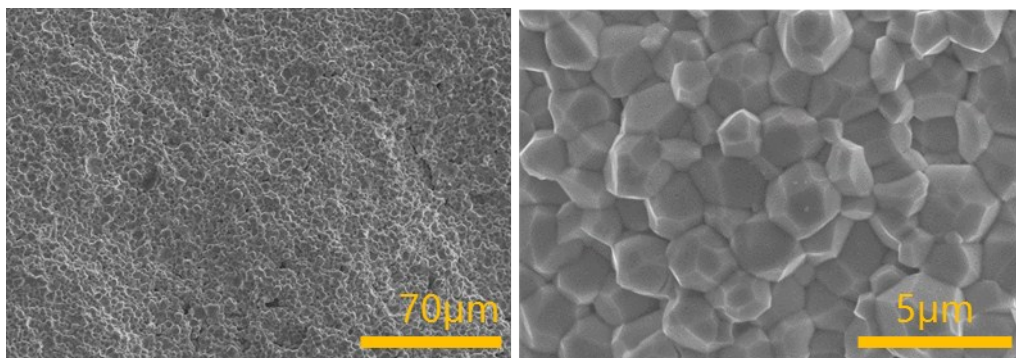

**Figure S2.** Cross sectional SEM images of a fractured LLZTO pellet at different magnifications.

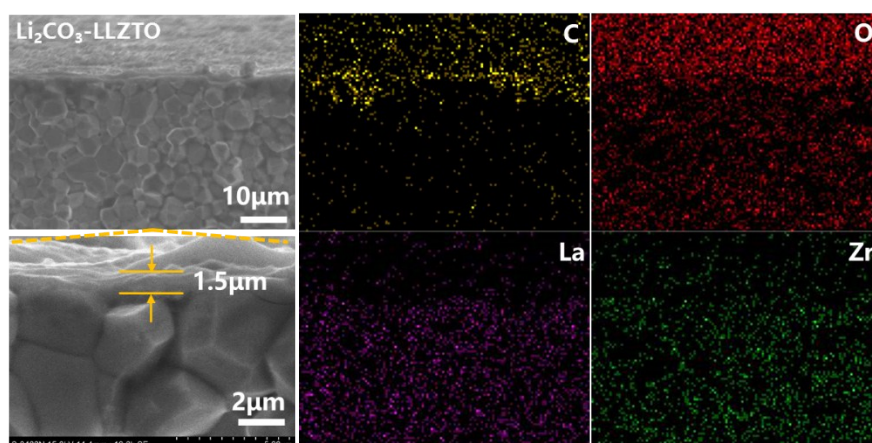

**Figure S3.** Cross sectional elemental mapping of  $\text{Li}_2\text{CO}_3\text{-LLZTO}$  including elemental C, O, La, Zr.

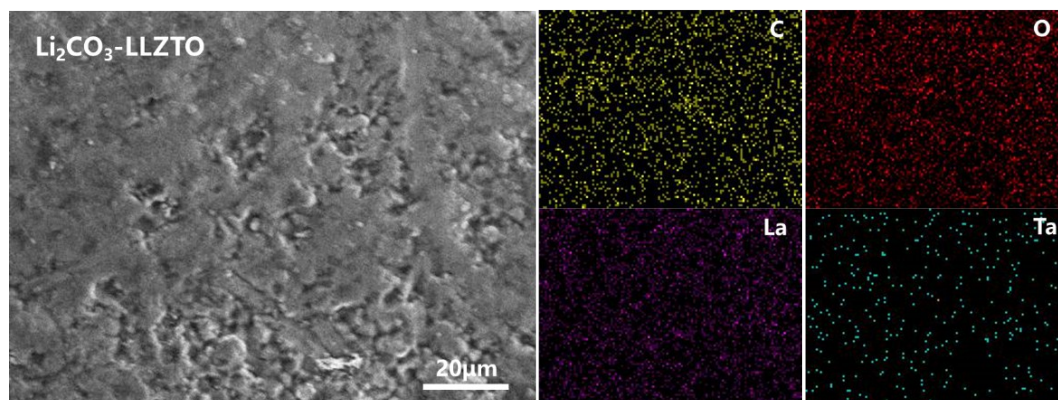

**Figure S4.** Surface elemental mapping of  $\text{Li}_2\text{CO}_3\text{-LLZTO}$  including elemental C, O, La, Ta.

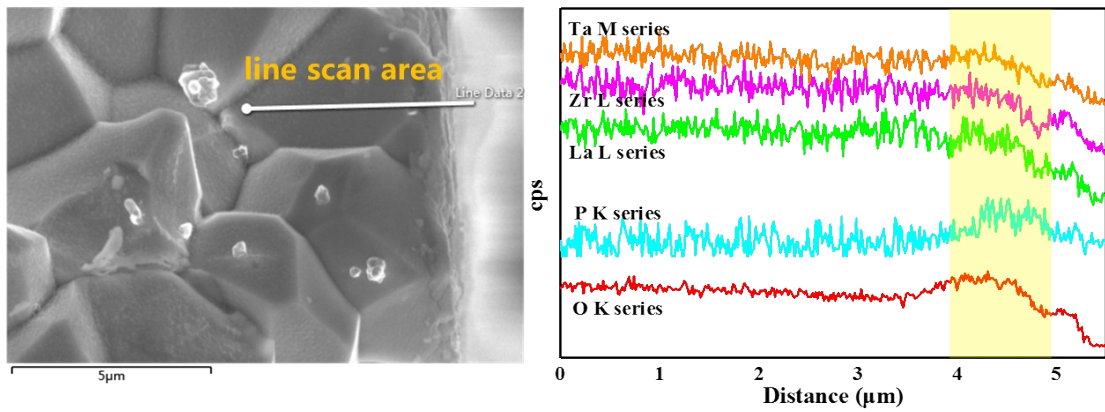

**Figure S5.** Cross sectional elemental mapping in line scan mode of  $\text{Li}_3\text{PO}_4\text{-LLZTO}$  including elemental P, O, La, Zr, Ta.

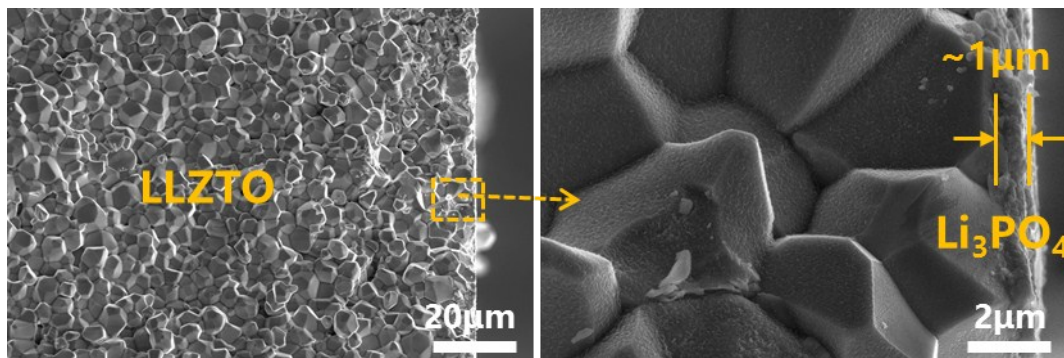

**Figure S6.** Cross sectional SEM images of  $\text{Li}_3\text{PO}_4\text{-LLZTO}$ . It shows clearly that the  $\text{Li}_3\text{PO}_4$  layer is  $\sim 1\ \mu\text{m}$  thick.

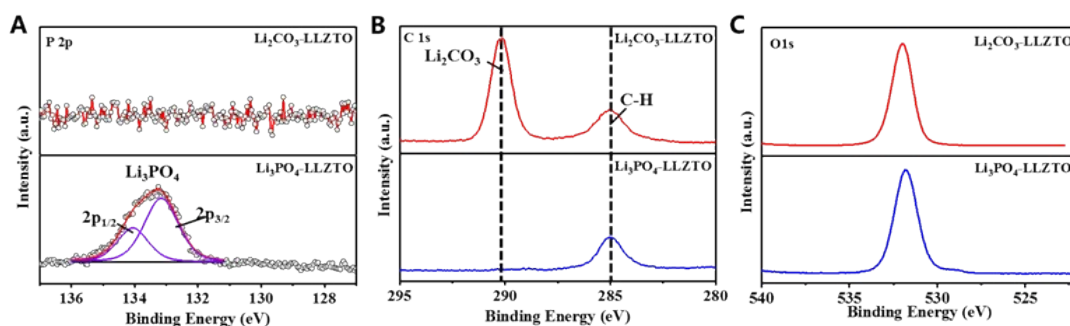

**Figure S7.** XPS spectra of  $\text{Li}_2\text{CO}_3\text{-LLZTO}$  and  $\text{Li}_3\text{PO}_4\text{-LLZTO}$ : (A) P 2p; (B) C 1s; (C) O 1s.

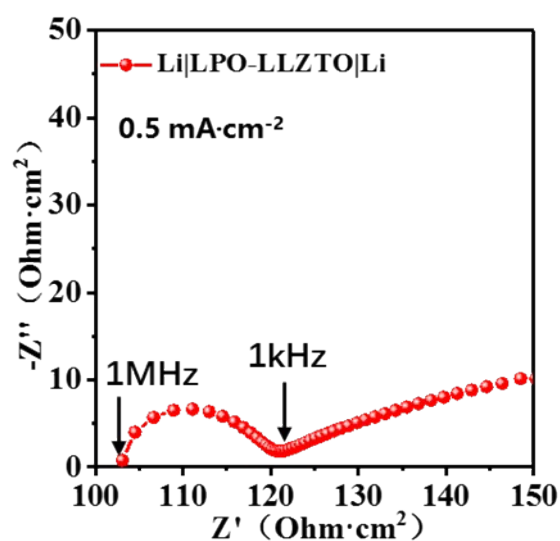

**Figure S8.** Nyquist plots of  $\text{Li} | \text{Li}_3\text{PO}_4\text{-LLZTO} | \text{Li}$  in the frequency ranging from 1 MHz to 10 mHz at  $25^\circ\text{C}$ , which was subsequently measured by galvanostatic cycling at a current density of  $0.5 \text{ mA cm}^{-2}$ .

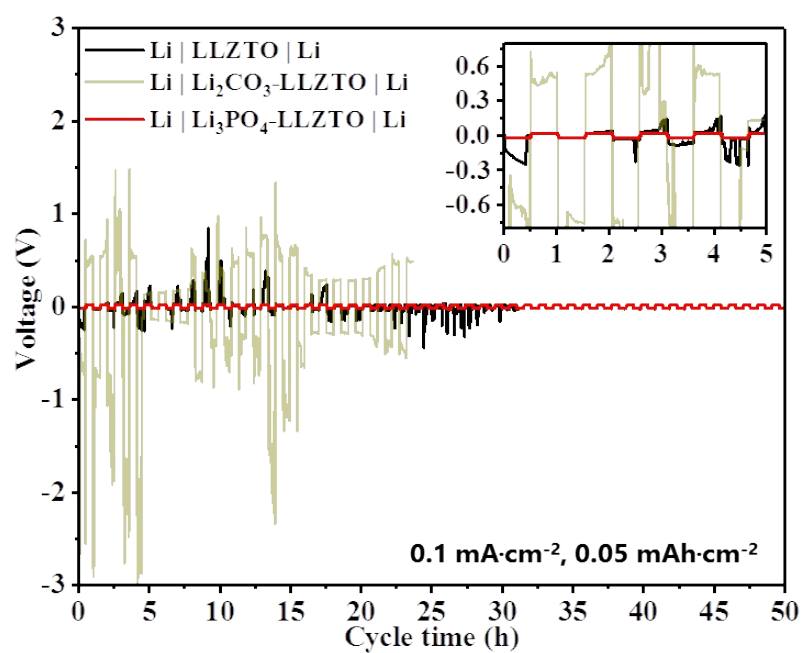

**Figure S9.** Comparison of galvanostatic cycling of the symmetric cells Li | LLZTO | Li, Li | Li<sub>2</sub>CO<sub>3</sub>-LLZTO | Li, Li | Li<sub>3</sub>PO<sub>4</sub>-LLZTO | Li at the current density of 0.1 mA cm<sup>-2</sup>. The discharge and charge period are half an hour respectively.

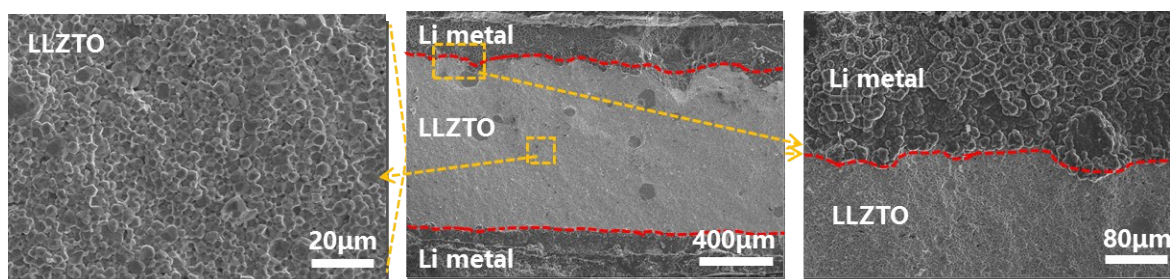



**Figure S10.** Surface and cross sectional SEM images of Li | Li<sub>3</sub>PO<sub>4</sub>-LLZTO | Li after long cycles at a current density of 0.5 mA cm<sup>-2</sup>. The interfacial contacts are still intimate and firm as well as no obvious lithium dendrite penetration is observed inside the LLZTO solid electrolyte.

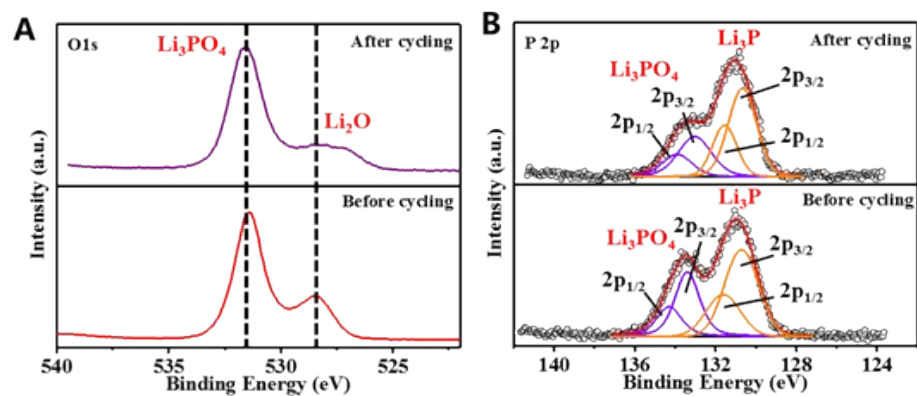

**Figure S11.** XPS spectra of anodic interface before and after prolonged cycling at a current density of 0.5 mA cm<sup>-2</sup>: (A) O 1s; (B) P 2p.

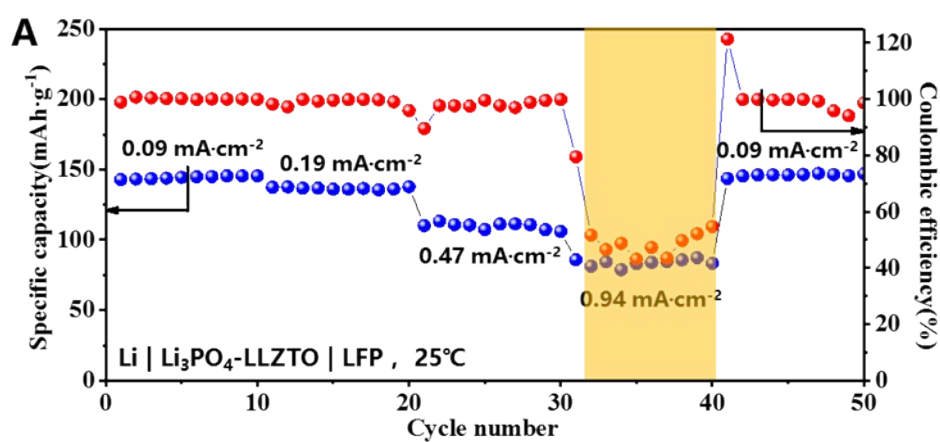

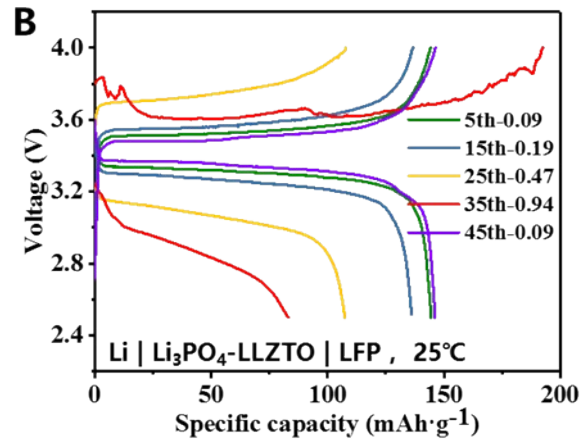

**Figure S12.** Galvanostatic charge/discharge performance (A) and the corresponding voltage profiles (B) of Li |  $\text{Li}_3\text{PO}_4$ -LLZTO | LFP cell at different current densities.

**Table S1.** Comparison of advanced anodic modification on garnet based solid state electrolytes (SSEs) by different methods

| Solid electrolyte  | Modification method                      | Special apparatus requirement | Li-SSE ASR (Ohm·cm <sup>2</sup> ) | CCD (mA·cm <sup>-2</sup> ) | Cycling performance (mA·cm <sup>-2</sup> /hours) | Reference        |
|--------------------|------------------------------------------|-------------------------------|-----------------------------------|----------------------------|--------------------------------------------------|------------------|
| LLZO-0.25Ca, Nb    | ALD for Al <sub>2</sub> O <sub>3</sub>   | ALD                           | 34                                | 0.2                        | 0.2/90                                           | <sup>3</sup>     |
| LLZO-0.4Ta         | Sputtering Au                            | Sputter coater                | 116                               | 0.5 (50°C)                 | 0.08/150                                         | <sup>4</sup>     |
| LLZO-0.25Ca, Nb    | PECVD for Si                             | PECVD                         | 127                               | 0.2                        | 0.1/225, 0.2/15                                  | <sup>5</sup>     |
| LLZO-0.1Ca-0.25Nb  | Evaporating Ge                           | Evaporator                    | 115                               | 0.1                        | 0.1/100                                          | <sup>6</sup>     |
| LLZO-0.25Ca, Nb    | Sputtering Al                            | Ebeam evaporator              | 75                                | 0.2                        | 0.1/40, 0.2/41                                   | <sup>7</sup>     |
| LLZO-0.25Ca, Nb    | ALD for ZnO                              | ALD                           | 20                                | 0.1                        | 0.1/50                                           | <sup>8</sup>     |
| LLZO-0.5Ta         | Heating treatment                        | Spark plasma sintering        | N/A                               | 0.6                        | N/A                                              | <sup>9</sup>     |
| LLZO-0.5Ta         | Carbon thermal reduction                 | Heat treatment equipment      | 45                                | 0.1                        | 0.1/450 (65°C)                                   | <sup>10</sup>    |
| LLZO-0.2Al, 0.25W  | Drawing graphite                         | No special technique          | 105                               | 0.3                        | 0.3/1000                                         | <sup>11</sup>    |
| LLZO-0.25Ca, Nb    | Sputtering Ag                            | Magnetron Sputtering          | 66                                | 0.2                        | 0.1/100, 0.2/100                                 | <sup>12</sup>    |
| LLZO-0.5Ta         | Li <sub>3</sub> N modification           | PECVD                         | ~150                              | 0.15                       | 0.15/50, 0.1/160                                 | <sup>13</sup>    |
| LLZO-0.5Ta-4wt%LZO | H <sub>3</sub> PO <sub>4</sub> treatment | No special technique          | 7                                 | 0.8                        | 0.1/1000, 0.5/450                                | <b>This work</b> |

\* LLZO-0.25Ca, Nb = Li<sub>7</sub>La<sub>3</sub>Zr<sub>2</sub>O<sub>12</sub> doped by 0.25 CaO and 0.125 Nb<sub>2</sub>O<sub>5</sub> (Li<sub>7</sub>La<sub>2.75</sub>Ca<sub>0.25</sub>Zr<sub>1.75</sub>Nb<sub>0.25</sub>O<sub>12</sub>), CCD (critical current density).

**Table S2.** The fitting parameters of XPS spectra on the  $\text{Li}_2\text{CO}_3$ -LLZTO and  $\text{Li}_3\text{PO}_4$ -LLZTO surface.

| Peak                                   | Position(eV) | Area     | FWHM(eV) | %GL(%) |
|----------------------------------------|--------------|----------|----------|--------|
| $\text{Li}_3\text{PO}_4$ -P $2p_{1/2}$ | 134.06       | 1054.955 | 1.16     | 39     |
| $\text{Li}_3\text{PO}_4$ -P $2p_{3/2}$ | 133.16       | 2109.91  | 1.28     | 32     |
| $\text{Li}_2\text{CO}_3$ -C $1s$       | 290          | N/A      | N/A      | N/A    |
| C-H-C $1s$                             | 285          | N/A      | N/A      | N/A    |
| $\text{Li}_3\text{PO}_4$ -O $1s$       | 531.85       | N/A      | N/A      | N/A    |
| $\text{Li}_2\text{CO}_3$ -O $1s$       | 532          | N/A      | N/A      | N/A    |

**Table S3.** The fitting parameters of XPS spectra on the  $\text{Li}_3\text{PO}_4$ -LLZTO surface before and after melting Li.

| Sample before melting Li               | Position(eV) | Area     | FWHM(eV) | %GL(%) |
|----------------------------------------|--------------|----------|----------|--------|
| $\text{Li}_3\text{PO}_4$ -P $2p_{1/2}$ | 134.06       | 1054.955 | 1.16     | 39     |
| $\text{Li}_3\text{PO}_4$ -P $2p_{3/2}$ | 133.16       | 2109.91  | 1.28     | 32     |
| $\text{Li}_3\text{PO}_4$ -O $1s$       | 531.85       | N/A      | N/A      | N/A    |
| Sample after melting Li                | Position(eV) | Area     | FWHM(eV) | %GL(%) |
| $\text{Li}_3\text{PO}_4$ -P $2p_{1/2}$ | 134.3        | 572.941  | 1.488    | 55     |
| $\text{Li}_3\text{PO}_4$ -P $2p_{3/2}$ | 133.4        | 1145.882 | 1.45     | 42     |
| $\text{Li}_3\text{P}$ -P $2p_{1/2}$    | 131.615      | 881.979  | 2        | 5      |
| $\text{Li}_3\text{P}$ -P $2p_{3/2}$    | 130.715      | 1763.958 | 1.98     | 1      |
| $\text{Li}_2\text{O}$ -O $1s$          | 528.45       | N/A      | N/A      | N/A    |
| $\text{Li}_3\text{PO}_4$ -O $1s$       | 531.45       | N/A      | N/A      | N/A    |

**Table S4.** Fitting parameters of Li | LLZTO | Li and Li | Li<sub>3</sub>PO<sub>4</sub>- LLZTO | Li symmetric cell.

The fitting circuit and results are presented in Figure 4.

| LLZTO                                       | R <sub>b</sub> | R <sub>1</sub> | CPE <sub>1</sub> -Y <sub>0</sub> | CPE <sub>1</sub> -N | C <sub>1pseduo</sub> |
|---------------------------------------------|----------------|----------------|----------------------------------|---------------------|----------------------|
| <b>Without Li<sub>3</sub>PO<sub>4</sub></b> | 143            | 1126           | 2.36E-08                         | 0.88511             | 6.00E-09             |
| <b>With Li<sub>3</sub>PO<sub>4</sub></b>    | 140.52         | 6.971          | 1.47E-06                         | 0.90975             | 4.70E-07             |

  

| LLZTO                                       | R <sub>2</sub> | CPE <sub>2</sub> -Y <sub>0</sub> | CPE <sub>2</sub> -N | C <sub>2pseduo</sub> | χ <sup>2</sup> |
|---------------------------------------------|----------------|----------------------------------|---------------------|----------------------|----------------|
| <b>Without Li<sub>3</sub>PO<sub>4</sub></b> | 1034.7         | 7.26E-05                         | 0.39475             | 1.37E-06             | 0.017275       |
| <b>With Li<sub>3</sub>PO<sub>4</sub></b>    | 25.047         | 0.030839                         | 0.2343              | 1.33E-02             | 0.0002103      |

Note: Units in table: R-Ohm·cm<sup>2</sup>, Y<sub>0</sub>-Mho, C-F, N, χ<sup>2</sup>-None.

**Table S5.** The fitting parameters of XPS spectra of anodic interface Li/LPO-LLZTO before and after prolonged cycling at the current density of 0.5 mA cm<sup>-2</sup>.

| Sample before cycling                                  | Position(eV) | Area     | FWHM(eV) | %GL(%) |
|--------------------------------------------------------|--------------|----------|----------|--------|
| <b>Li<sub>3</sub>PO<sub>4</sub>-O 1s</b>               | 531.45       | N/A      | N/A      | N/A    |
| <b>Li<sub>2</sub>O-O 1s</b>                            | 528.45       | N/A      | N/A      | N/A    |
| <b>Li<sub>3</sub>PO<sub>4</sub>-P 2p<sub>1/2</sub></b> | 134.3        | 572.941  | 1.488    | 55     |
| <b>Li<sub>3</sub>PO<sub>4</sub>-P 2p<sub>3/2</sub></b> | 133.4        | 1145.882 | 1.45     | 42     |
| <b>Li<sub>3</sub>P-P 2p<sub>1/2</sub></b>              | 131.615      | 881.979  | 2        | 5      |
| <b>Li<sub>3</sub>P-P 2p<sub>3/2</sub></b>              | 130.715      | 1763.958 | 1.98     | 1      |

  

| Sample after cycling                                   | Position(eV) | Area     | FWHM(eV) | %GL(%) |
|--------------------------------------------------------|--------------|----------|----------|--------|
| <b>Li<sub>3</sub>PO<sub>4</sub>-O 1s</b>               | 531.55       | N/A      | N/A      | N/A    |
| <b>Li<sub>3</sub>PO<sub>4</sub>-P 2p<sub>1/2</sub></b> | 134.1        | 458.595  | 1.80     | 25     |
| <b>Li<sub>3</sub>PO<sub>4</sub>-P 2p<sub>3/2</sub></b> | 133.2        | 917.190  | 2.00     | 25     |
| <b>Li<sub>3</sub>P-P 2p<sub>1/2</sub></b>              | 131.6        | 800.661  | 1.45     | 10     |
| <b>Li<sub>3</sub>P-P 2p<sub>3/2</sub></b>              | 130.7        | 1601.322 | 1.70     | 10     |

## References

1. Y. Lu, X. Huang, Z. Song, K. Rui, Q. Wang, S. Gu, J. Yang, T. Xiu, M. E. Badding and Z. Wen, *Energy Storage Materials*, 2018, **15**, 282-290.
2. X. Huang, C. Shen, K. Rui, J. Jin, M. F. Wu, X. W. Wu and Z. Y. Wen, *Jom*, 2016, **68**, 2593-2600.
3. X. Han, Y. Gong, K. K. Fu, X. He, G. T. Hitz, J. Dai, A. Pearse, B. Liu, H. Wang, G. Rubloff, Y. Mo, V. Thangadurai, E. D. Wachsman and L. Hu, *Nat Mater*, 2017, **16**, 572-579.
4. C. L. Tsai, V. Roddatis, C. V. Chandran, Q. Ma, S. Uhlenbruck, M. Bram, P. Heitjans and O. Guillon, *ACS Appl Mater Interfaces*, 2016, **8**, 10617-10626.
5. W. Luo, Y. Gong, Y. Zhu, K. K. Fu, J. Dai, S. D. Lacey, C. Wang, B. Liu, X. Han, Y. Mo, E. D. Wachsman and L. Hu, *J Am Chem Soc*, 2016, **138**, 12258-12262.
6. W. Luo, Y. Gong, Y. Zhu, Y. Li, Y. Yao, Y. Zhang, K. K. Fu, G. Pastel, C. F. Lin, Y. Mo, E. D. Wachsman and L. Hu, *Adv Mater*, 2017, **29**, 1606042.
7. K. K. Fu, Y. Gong, B. Liu, Y. Zhu, S. Xu, Y. Yao, W. Luo, C. Wang, S. D. Lacey, J. Dai, Y. Chen, Y. Mo, E. Wachsman and L. Hu, *Sci Adv*, 2017, **3**, e1601659.
8. C. Wang, Y. Gong, B. Liu, K. Fu, Y. Yao, E. Hitz, Y. Li, J. Dai, S. Xu, W. Luo, E. D. Wachsman and L. Hu, *Nano Lett*, 2017, **17**, 565-571.
9. R. Hongahally Basappa, T. Ito, T. Morimura, R. Bekarevich, K. Mitsuishi and H. Yamada, *Journal of Power Sources*, 2017, **363**, 145-152.
10. Y. Li, X. Chen, A. Dolocan, Z. Cui, S. Xin, L. Xue, H. Xu, K. Park and J. B. Goodenough, *J Am Chem Soc*, 2018, DOI: 10.1021/jacs.8b03106, 6448-6455.
11. Y. J. Shao, H. C. Wang, Z. L. Gong, D. W. Wang, B. Z. Zheng, J. P. Zhu, Y. X. Lu, Y. S. Hu, X. X. Guo, H. Li, X. J. Huang, Y. Yang, C. W. Nan and L. Q. Chen, *Acs Energy Letters*, 2018, **3**, 1212-1218.
12. W. Feng, X. Dong, P. Li, Y. Wang and Y. Xia, *Journal of Power Sources*, 2019, **419**, 91-98.
13. H. Xu, Y. Li, A. Zhou, N. Wu, S. Xin, Z. Li and J. B. Goodenough, *Nano Lett*, 2018, **18**, 7414-7418.
